# Supplementary material for: New Pharmacological Strategies against Pancreatic Adenocarcinoma: The Multifunctional Thiosemicarbazone FA4
Source: MDPI journal article supplement (doi:10.3390/molecules27051682), 2022-03-04
Supplement: s1 [file s1]

# **New Pharmacological Strategies against Pancreatic Adenocarcinoma: The Multifunctional Thiosemicarbazone FA4**

**Dario P. Anobile** <sup>1,2</sup>, **Mauro Niso** <sup>3</sup>, **Adrian Puerta** <sup>2,4</sup>, **Stephanie M. Fraga Rodrigues** <sup>2</sup>,  
**Francesca S. Abatematteo** <sup>3</sup>, **Amir Avan** <sup>5,6</sup>, **Carmen Abate** <sup>3,\*,†</sup>, **Chiara Riganti** <sup>2,7,\*,†</sup>  
and **Elisa Giovannetti** <sup>2,8,\*,†</sup>

<sup>1</sup> Department of Oncology, University of Torino, Via Santena 5/bis, 10026 Torino, Italy; dario.anobile@edu.unito.it

<sup>2</sup> Department of Medical Oncology, Amsterdam UMC, VU University, Cancer Center Amsterdam, De Boelelaan 1117, 1081HV Amsterdam, The Netherlands; apuertaa@ull.edu.es (A.P.); s.m.fragarodrigues@amsterdamumc.nl (S.M.F.R.)

<sup>3</sup> Dipartimento di Farmacia-Scienze del Farmaco, Università degli Studi di Bari ALDO MORO, Via Orabona 4, 70125 Bari, Italy; mauro.niso@uniba.it (M.N.); francesca.abatematteo@uniba.it (F.S.A.)

<sup>4</sup> BioLab, Instituto Universitario de Bio-Orgánica “Antonio González” (IUBO-AG), Universidad de La Laguna, c/Astrofísico Francisco Sánchez 2, 38206 La Laguna, Spain

<sup>5</sup> Basic Medical Sciences Institute, Mashhad University of Medical Sciences, Mashhad 91886-17871, Iran; avana@mums.ac.ir

<sup>6</sup> Basic Medical Sciences Institute, Mashhad University of Medical Sciences and Metabolic Syndrome Research Center, Mashhad University of Medical Science, Mashhad 91886-17871, Iran

<sup>7</sup> Interdepartmental Research Center of Molecular Biotechnology, University of Torino, 10126 Torino, Italy

<sup>8</sup> Fondazione Pisana per la Scienza, Via Ferruccio Giovannini 13, 56017 San Giuliano Terme, Italy

\* Correspondence: carmen.abate@uniba.it (C.A.); chiara.riganti@unito.it (C.R.); e.giovannetti@amsterdamumc.nl (E.G.)

† These authors contributed equally to this work.

# Supplementary Figure S1

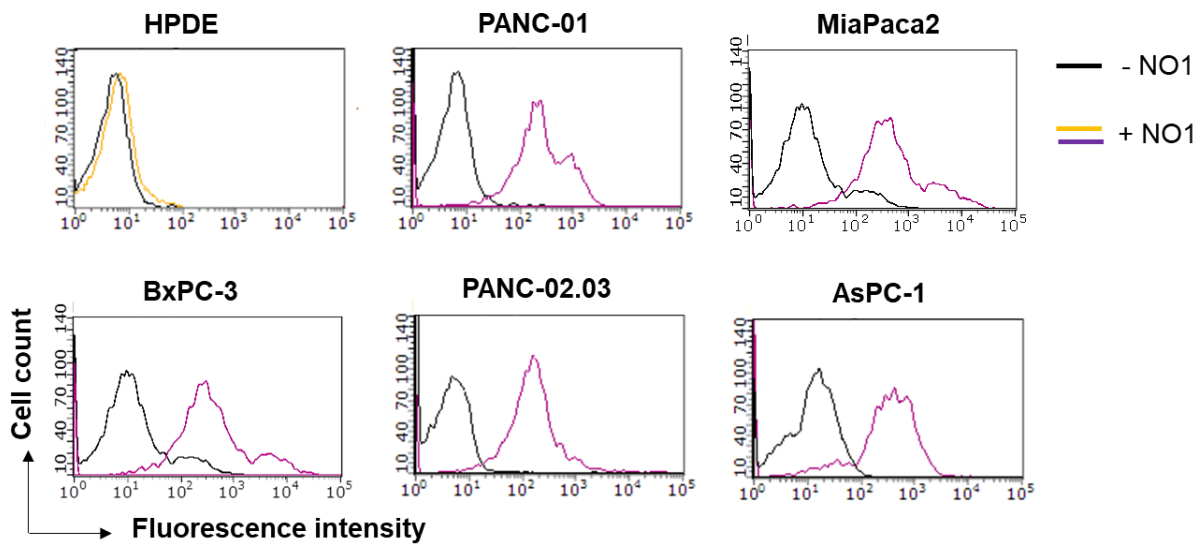

**Supplementary Figure S1.** Amount of plasma-membrane associated  $\sigma_2$ -receptor on pancreatic cancer cells and non-transformed pancreatic epithelial cells. The amount of  $\sigma_2$ -receptors present on the plasma-membrane of non-transformed HPDE cells and pancreatic ductal adenocarcinoma PANC-1, MiaPaCa2, BxPC-3, PANC-02.03, AsPC-1 cells, incubated in the absence (-) or presence (+) of 100 nM NO1, a  $\sigma_2$  receptor fluorescent ligand, was measured by flow cytometry, in duplicates. The figures report representative histograms of three independent experiments.

## Supplementary Figure S2

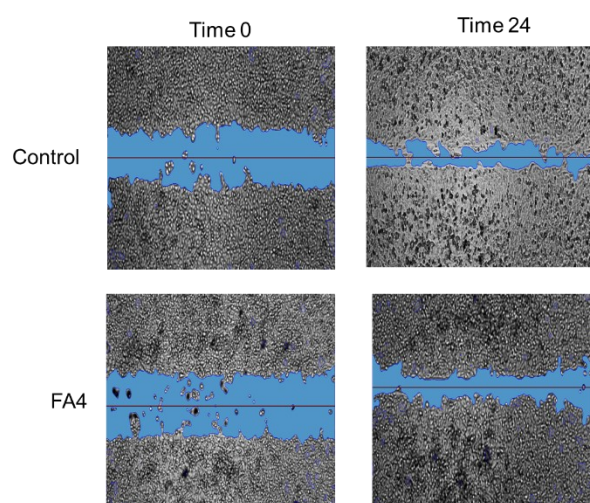

**Supplementary Figure S2.** Results of the migration assay performed in PDAC-1 cells. After the scratch, PDAC-2 cells were incubated in fresh medium (Control) or with **FA4** 10  $\mu$ M. Representative pictures from three independent experiments were taken at different time points (0 and 24 h).
